# Supplementary material for: A bHLH transcription factor, DvIVS, is involved in regulation of anthocyanin synthesis in dahlia (Dahlia variabilis)
Source: PubMed Central journal article supplement — J Exp Bot. 2011 Jul 16;62(14):5105–16. doi: 10.1093/jxb/err216 (PMC3193017; doi:10.1093/jxb/err216), 2011-07-16
Supplement: supp_err216_00062158_file001.pdf [file supp_err216_00062158_file001.pdf]

## Supplemental material

### Manuscript title

A bHLH transcription factor, *DvIVS*, is involved in regulation of anthocyanin synthesis in dahlia (*Dahlia variabilis*)

### Authors

Sho Ohno<sup>1</sup> · Munetaka Hosokawa<sup>1\*</sup> · Atsushi Hoshino<sup>2</sup> · Yoshikuni Kitamura<sup>1</sup> · Yasumasa Morita<sup>2</sup> · Kyeong-II Park<sup>2</sup> · Akiko Nakashima<sup>1</sup> · Ayumi Deguchi<sup>1</sup> · Fumi Tatsuzawa<sup>3</sup> · Motoaki Doi<sup>1</sup> · Shigeru Iida<sup>2</sup> · Susumu Yazawa<sup>1</sup>

Supplemental figures

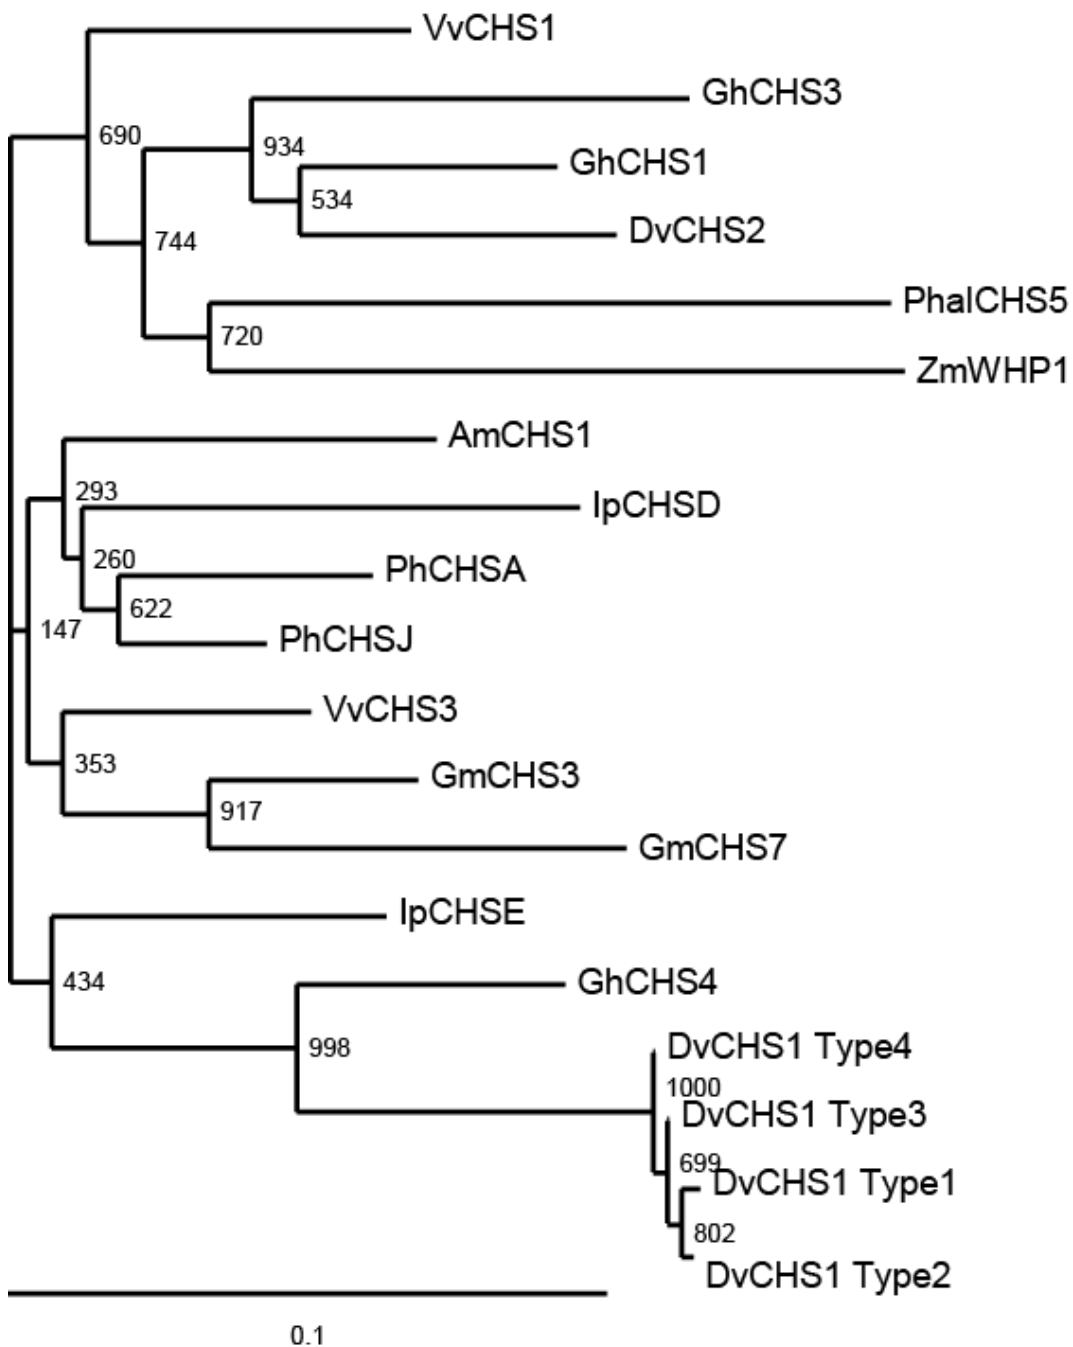

**Fig. S1.** Phylogenetic tree for CHS associated with flavonoid synthesis. The entire amino acid sequences were aligned using ClustalW, and the tree was constructed by the neighbor-joining method. The bootstrap values of 1000 retrials are indicated on each branch, and the scale shows 0.1 amino acid substitutions per site. DvCHS1 were classified into 4 types on the basis of each deduced amino acid sequence. The abbreviation shown in front of each protein indicates plant species: Dv, *Dahlia*

*variabilis*; Am, *Antirrhinum majus*; Gh, *Gerbera hybrida*; Gm, *Glycine max*; Ip, *Ipomoea purpurea*; Ph, *Petunia hybrida*; Phal, *Phalaenopsis* hybrid cultivar; Vv, *Vitis vinifera*; Zm, *Zea mays*. Accession numbers of each protein: DvCHS1 Type1 (BAJ14515), DvCHS1 Type2 (BAJ14516), DvCHS1 Type3 (BAJ14517), DvCHS1 Type4 (BAJ14518), DvCHS2 (BAJ14519), AmCHS1 (X03710), GhCHS1 (Z38096), GhCHS3 (Z38098), GhCHS4 (CAP20328), GmCHS3 (AAQ62589), GmCHS7 (AAA33950), IpCHSD (AB001818), IpCHSE (AB001819), PhCHSA (X14591), PhCHSJ (X14597), PhalCHS5 (AAY83389), VvCHS1 (ABM67586), VvCHS3 (BAB84111), and ZmWHP1 (CAA42763).

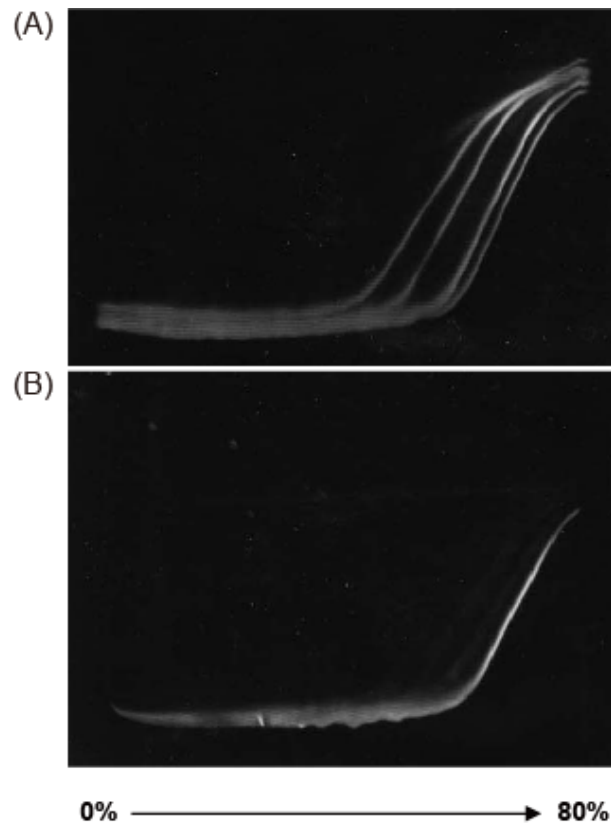

**Fig. S2.** DGGE analysis of *DvCHS1* cDNA from MJOr (A) and MJY (B). The percentages below the figure indicate the concentration gradient of denaturation. Primers used detected SNPs between 1024 and 1237, as shown in Table S7.

## Supplemental tables

Table S1. Degenerate primers used for isolating the cDNA fragment

| Genes          | Forward Primer            | Reverse Primer             | Used sequences for designing primers                                                                                                                                                                                                                                                                                                               |
|----------------|---------------------------|----------------------------|----------------------------------------------------------------------------------------------------------------------------------------------------------------------------------------------------------------------------------------------------------------------------------------------------------------------------------------------------|
| <i>DvCHS1</i>  | GTGTGCTCCGAGATYACKGC      | ACGCTTTTGGAGDAGATGAAA      | DQ521272 ( <i>Chrysanthemum x morifolium</i> )<br>Z67988 ( <i>Callistephus chinensis</i> )<br>Z38096 ( <i>Gerbera hybrid</i> )                                                                                                                                                                                                                     |
| <i>DvCHI</i>   | TKICCI GTIARI GGIARDAT    | AARTTYACIGBIATHGGIGT       | EF094933 ( <i>Chrysanthemum x morifolium</i> )<br>Z67980 ( <i>Callistephus chinensis</i> )<br>AF509335 ( <i>Saussurea medusa</i> )<br>AB080768 ( <i>Ipomoea batatas</i> )<br>AB234907 ( <i>Verbena x hybrida</i> )<br>prf: 1807331B ( <i>Petunia x hybrida</i> )<br>AB213651 ( <i>Nicotiana tabacum</i> )<br>DQ120521 ( <i>Camellia sinensis</i> ) |
| <i>DvF3H</i>   | CATCGTTTCTAGCCATCTTC      | TTCASCACTACYTTTTGGTC       | U86837 ( <i>Chrysanthemum x morifolium</i> )<br>X72593 ( <i>Callistephus chinensis</i> )                                                                                                                                                                                                                                                           |
| <i>DvDFR</i>   | GACACAAGAAGGAAGCTTTG      | GATRAAYGGACCAACTACYA       | Z67981 ( <i>Callistephus chinensis</i> )<br>Z17221 ( <i>Gerbera hybrid</i> )                                                                                                                                                                                                                                                                       |
| <i>DvANS</i>   | TACCCAAAATGCCCTCAACC      | CAACTTGTGTTCCATATG         | AF015885 ( <i>Callistephus chinensis</i> )<br>AY997840 ( <i>Gerbera hybrid</i> cultivar Tacora)<br>AY997841 ( <i>Gerbera hybrid</i> cultivar Ansofie)<br>AY997842 ( <i>Gerbera hybrid</i> cultivar Fame)<br>AY547342 ( <i>Saussurea medusa</i> )                                                                                                   |
| <i>DvDEL</i>   | GGTACTAYAATGGMGAYATHAARA  | AATACGGAAARCAYACWACWGTCT   | M84913 ( <i>Antirrhinum majus</i> )<br>AF020545 ( <i>Petunia x hybrida</i> )<br>AB024050 ( <i>Perilla frutescens</i> )<br>AB232774 ( <i>Ipomoea nil</i> )<br>AJ007709 ( <i>Gerbera hybrid</i> cv. 'Terra Regina')                                                                                                                                  |
| <i>DvIVS</i>   | ATGGRTAYTAYAACGGYGCRATAAA | ATCACTCTCKATRATIGAHACYTCYA | AB154369 ( <i>Ipomoea purpurea</i> )<br>AB154370 ( <i>Ipomoea tricolor</i> )<br>AB103172 ( <i>Perilla frutescens</i> )<br>AJ277509 ( <i>Arabidopsis thaliana</i> )<br>AF260919 ( <i>Petunia x hybrida</i> )                                                                                                                                        |
| <i>DvActin</i> | GCCAAYAGAGARAAGATGAC      | ACCAGARTCCARCACAATAC       | AY064043 ( <i>Arabidopsis thaliana</i> )<br>AB047313 ( <i>Oryza sativa</i> )<br>AY372368 ( <i>Trifolium pratense</i> )<br>AY305724 ( <i>Gossypium hirsutum</i> )<br>AF548026 ( <i>Stevia rebaudiana</i> )                                                                                                                                          |

Table S2. Primers used for RACE

| Genes          |                  | First PCR Primers                                        | Nested PCR Primers                                        |
|----------------|------------------|----------------------------------------------------------|-----------------------------------------------------------|
| <i>DvCHS1</i>  | 5'RACE<br>3'RACE | CGCGCCTCCACTATCCGGTAGAATA<br>GGTGACGGTGACGCCGCGATCAT     |                                                           |
| <i>DvCHS2</i>  | 5'RACE<br>3'RACE | GGCGGGGTTGCAGTGCCGATGGCAA<br>TGGCTCCGTCTTTGGACGCCCGTCA   | GCTCGGTAAAGATGCGGCTGTCAAA                                 |
| <i>DvCHI</i>   | 5'RACE<br>3'RACE | GGGACCAGTAACGATGTCCCTAAA<br>GGCAAACCGCCACGAGTTGAC        | TGGGTCAACTCGTGGGCGGTTTT<br>GGACATCGTTACTGGTCCCTTTGA       |
| <i>DvF3H</i>   | 5'RACE<br>3'RACE | AGGGCCTCTTTTTCAAGGCCATT<br>TGGGCGGTTCAAGAACGCGGATCA      | AGAGCTTGCAGGCCAGGCCATTAA<br>ACGCGGATCACCAAGCCGTGGTCAA     |
| <i>DvDFR</i>   | 5'RACE<br>3'RACE | GTGACTCGTCATAGACCGGAAGTT<br>ACTTCCTCTGCCGGAACGGTAAA      |                                                           |
| <i>DvANS</i>   | 5'RACE<br>3'RACE | CCTTAGAAACCGTCTCCGGGAGCGGTT<br>CCCAAAATGCCCTCAACCGGAGCTA | CCGGGAGCGGTTTCAGGATGATCTT<br>CCGGAGCTAGCACTCGGTGTTGAA     |
| <i>DvMYB1</i>  | 5'RACE<br>3'RACE | CAGATAGTGTGGGTGACGGGACTA<br>GCGGGGAGAATACCAGGAAGAACT     | GGGTGACGGGACTAACCCTTGGGAAATA1<br>TTCGACCCCGTCCCAAACCACAAA |
| <i>DvMYB2</i>  | 5'RACE<br>3'RACE | TGGTGGTGGTGGCGGGGACGGTTGT<br>CCGCCCTGACCTCAAATGTGGCAACT  | CCACTTGTACCAAGAAGGCTATGGA<br>GTGGCAACTTCTCCGAAGAAGAAGA    |
| <i>DvDEL</i>   | 5'RACE<br>3'RACE | CCTTCTCTGGTACGCCGAACTCAA<br>CCACGAAGGCCTCTGGCTGCATTGT    | GGTACGCCGAACTCAACTATACCTT<br>CCTCTGGCTGCATTGTCCCCTGAAGAT  |
| <i>DvIVS</i>   | 5'RACE<br>3'RACE | CCAAGGATCGACGCCTTGTCATT<br>TCCATCGCCTCTCGCCTCGGCAAAA     | GTCACCAACGGCACCAACGTTCTAA<br>GCGCGAACCACGTCCTAGCGGAA      |
| <i>DvWDR1</i>  | 5'RACE<br>3'RACE | AAGCCGACCACTGCACCTGGTTAAT<br>CCGTTAGGGTTTTCGACCTTCGCGATA | GGAGCCCAAGCAATCGCATTGACACT<br>TCGACCTTCGCGATAAGGAACACT    |
| <i>DvWDR2</i>  | 5'RACE<br>3'RACE | TGCGAATCATCCCGACCGTACAT<br>GGATAGTGCGAAGGTTGTGGTGCTT     | GCAATCGCGTTCACACTCGACTGAT<br>CGTTTCCCGACGTTACCTGTTGT      |
| <i>DvActin</i> | 3'RACE           | TATGTTGCTATCCAGGCCGT                                     | TCTCTTTATGCCAGTGGTCG                                      |

Table S3. Primers used for semi-quantitative RT-PCR

| Genes          | Forward Primers           | Reverse Primers             |
|----------------|---------------------------|-----------------------------|
| <i>DvCHS1</i>  | AATCCCGGTTTCAAGTGATTA     | ATGCAATGTAAGTGACAACATA      |
| <i>DvCHS2</i>  | TCTTATTACTGCTCGCAATATCTT  | AGTTAGGGCGAAATCGGCATGGTA    |
| <i>DvCHI</i>   | ATGGCTGGTCTKGAGGTCGAA     | GGGCTGAGCTTATTTATTAC        |
| <i>DvF3H</i>   | CATCTTTGAAATGGGACGAGACTTC | GATTACTCAAACACTTCATTATTT    |
| <i>DvDFR</i>   | ATCGGCTCCTGGTTAGTTAT      | CCATTAATAATATGAACTTTATTAA   |
| <i>DvANS</i>   | TACCTTCCATCCATCATGGTCACTT | GTTCTTAGAATGACCCAAACAACAA   |
| <i>DvMYB1</i>  | CACAAACATTTTCAATAGAAAATTG | TAAGAAAGTTATACTCCGTTACATC   |
| <i>DvMYB2</i>  | ACAAAAAGATATCAAAAAGAACAA  | AAATCCAAATGAGAATTCATTTTTCAT |
| <i>DvDEL</i>   | ATCTCCTCCAATTCATCAAGATTTT | CCTTTTCTACAGATCAATCAAACAT   |
| <i>DvIVS</i>   | TTTGACGTAATTTTGGACCTAATTT | CATCCATTTTTAAATTGTTTGTGGT   |
| <i>DvWDR1</i>  | TTTCTACTTTTCCAATAATATCACA | AGATTCTGTAAAACCTTAATATGACT  |
| <i>DvWDR2</i>  | GATACAGATTATCCCAATTCCAAA  | GTATTCCCAAACCTATATAGGCTAA   |
| <i>DvActin</i> | TGCTTATGTTGGTGATGAAG      | CCCTGTTAGCCTTAGGATTT        |

Table S4. Primers used for real-time RT-PCR

| Genes          | Forward Primers         | Reverse Primers          |
|----------------|-------------------------|--------------------------|
| <i>DvCHS1</i>  | CATGTGCTAAGCGAATACGG    | CCTCTCCGGTGGTATTGAAC     |
| <i>DvCHS2</i>  | TGTCCCAACTACCATGCCGATTT | TTACACATTAAAATGACACAGTGA |
| <i>DvIVS</i>   | GCATATGCAAAGCAGCAAGATCT | TGAAGAAAAGTTTCACATGTTGA  |
| <i>DvActin</i> | TGCTTATGTTGGTGATGAAG    | CCCTGTTAGCCTTAGGATTT     |



Table S5. Primers used for analyzing the *DvIVS* genomic region and *Tdv1*

| Genes        |             | Primers                    |
|--------------|-------------|----------------------------|
| <i>DvIVS</i> | IVS-Full-F  | TTTGACGTAATTTTGGACCTAATTT  |
|              | 35S-IVS-F   | ATGGCTGCCGCTGGTTCGGTAAACG  |
|              | IVS-474F    | CGGTGAGCAACAGGTGGCGGAGAA   |
|              | IVS-611R    | CCGACACCAGGAGGAAATGAGAAA   |
|              | IVS-625F    | GCATATGCAAAGCAGCAAGATCTAT  |
|              | IVS-725F    | CGGTGATATGCATCCCTGTACTAAA  |
|              | IVS-826R    | TGAAGAAAAGTTTCACATGTTGAAT  |
|              | IVS-1082F   | TGCCTCACAATAATAAAGATTCAAT  |
|              | IVS-1316F   | CAGAAGAATTTGCACCGGAGTTTA   |
|              | IVS-1614R   | GAGCTCTTCGTGCGACGTCGTTTT   |
|              | IVS-G1163F  | TCCCAGCTCACGGTTCAGTTTTAAA  |
|              | IVS-G2241F  | AAGTGCTGAGCCAGTAAGACTGTTT  |
|              | IVS-G2633F  | TTGAATAAACAAAGTTGATAGTAAT  |
|              | IVS-G2844F  | GATTAGGGATCCTTTTCAACAACAT  |
|              | IVS-G2869R  | AATGTTGTTGAAAAGGATCCCTAAT  |
|              | IVS-G3415F  | ATATCTGATCGTAATTTAACAAATT  |
|              | IVS-GR3012R | CTTGGGTACATTTTCATATGTAATTT |
|              | IVS-GR3637R | GATTCACGTGTGACGTATTATTGTT  |
|              | IVS-GR4193R | AGTACTTTTATGACTTTTATGAGAAA |
|              | IVS-Full-R  | CATCCATTTTTAAATTGTTTGTGGT  |
| <i>Tdv1</i>  | IVS-TP1F    | TAGCGGCGACAATTGTCGCCGCT    |
|              | IVS-TP2F    | CGAAATATAAACAAACAAAGTTAAA  |
|              | IVS-TP3F    | ATATTCAACTTTTAGTTTATTCAA   |
|              | IVS-TP4F    | ACATATTAGCATTTTAAACTTGT    |
|              | IVS-TP1R    | CACTACAAGAAATATAGTCAATA    |
|              | IVS-TP2R    | GAGCATTTATACATTTGATAAAT    |
|              | IVS-TP3R    | CATAAGTAAATGGTGGGCCTCATA   |
|              | IVS-TP4R    | TGTCAAACATGTCAGTCAAACAT    |
|              | IVS-TP5R    | CGTGTGCAAAATGTCAGAATACT    |
|              | IVS-TP6R    | TAATGAGAGTCGGTGGGTCGATA    |
|              | IVS-TP7R    | ACTCCTTCAATACGTGTAACAAA    |
|              | IVS-TP8R    | AATGTTTGCATAATTAGGCATTT    |
|              | IVS-TP9R    | CATTAACGTATTAGCGGCGACACTA  |

Table S6. Primers used for confirming the sequence

| Genes         | 5' direction Primers      | 3' direction Primers      |
|---------------|---------------------------|---------------------------|
| <i>DvCHS1</i> | TGTTGTTCTCGGCCAAGTCT      | GTCGGGCTAACGTTTCATCT      |
| <i>DvF3H</i>  | GTGAATTATTACCCAAAGTGTCCAC | TTGGTCCATATCAACACAAGCTTTT |
| <i>DvDFR</i>  | TCCAATGTGACTCGTCATAGA     | TGGGATCGATGAGGATTTATC     |

**Table S7.** SNPs of *DvCHS1* cDNA in MJOr and MJY

| Line | Deduced AA Type | Number of clones | Number of bases |    |    |     |     |     |     |     |     |     |     |     |     |     |     |     |     |     |     |     |     |     |     |      |      |      |      |      |      |      |      |
|------|-----------------|------------------|-----------------|----|----|-----|-----|-----|-----|-----|-----|-----|-----|-----|-----|-----|-----|-----|-----|-----|-----|-----|-----|-----|-----|------|------|------|------|------|------|------|------|
|      |                 |                  | 27              | 45 | 47 | 197 | 203 | 287 | 377 | 446 | 491 | 602 | 611 | 614 | 623 | 641 | 644 | 657 | 719 | 761 | 764 | 773 | 809 | 942 | 953 | 1024 | 1025 | 1154 | 1178 | 1184 | 1237 | 1345 | 1348 |
| MJOr | 1               | 3                | C               | C  | G  | G   | T   | C   | A   | A   | T   | G   | T   | T   | G   | A   | C   | A   | C   | T   | G   | C   | T   | T   | T   | A    | A    | G    | G    | G    | T    | T    | C    |
|      |                 | 1                | C               | C  | G  | G   | T   | C   | A   | A   | T   | G   | T   | T   | G   | A   | C   | A   | C   | T   | G   | C   | T   | T   | T   | A    | A    | G    | G    | G    | T    | T    | C    |
|      |                 | 15               | G               | A  | A  | A   | C   | A   | C   | G   | T   | G   | C   | T   | G   | G   | C   | A   | A   | C   | T   | C   | G   | C   | C   | A    | G    | G    | C    | G    | T    | A    | T    |
|      | 2               | 1                | G               | A  | A  | A   | C   | A   | C   | G   | T   | G   | C   | T   | G   | G   | C   | A   | A   | C   | T   | C   | G   | C   | C   | A    | G    | G    | C    | G    | T    | A    | T    |
|      |                 | 1                | G               | A  | A  | A   | C   | A   | C   | G   | T   | G   | C   | T   | G   | G   | C   | A   | A   | C   | T   | C   | G   | C   | C   | A    | G    | G    | C    | G    | T    | A    | T    |
|      |                 | 1                | C               | C  | G  | A   | C   | A   | C   | G   | T   | G   | C   | T   | G   | G   | C   | A   | A   | C   | T   | C   | G   | C   | C   | A    | G    | G    | C    | G    | T    | A    | T    |
|      |                 | 1                | C               | C  | G  | A   | C   | A   | C   | G   | T   | G   | C   | T   | G   | G   | C   | A   | A   | C   | T   | C   | G   | C   | C   | A    | G    | G    | C    | G    | T    | A    | T    |
|      | 3               | 1                | C               | C  | G  | A   | C   | A   | C   | G   | C   | C   | A   | C   | C   | G   | T   | G   | C   | C   | G   | T   | G   | C   | C   | A    | G    | C    | C    | G    | T    | A    | T    |
|      |                 | 12               | C               | C  | G  | A   | C   | A   | C   | G   | C   | C   | A   | C   | C   | G   | T   | G   | C   | C   | G   | T   | G   | C   | C   | A    | G    | C    | G    | A    | C    | A    | C    |
|      | 4               | 1                | C               | C  | G  | A   | C   | A   | C   | G   | C   | C   | A   | C   | C   | G   | T   | G   | C   | C   | G   | T   | G   | C   | C   | A    | G    | C    | G    | A    | C    | A    | C    |
|      |                 | 1                | G               | A  | A  | A   | C   | A   | C   | G   | C   | C   | A   | C   | C   | G   | T   | G   | C   | C   | G   | T   | G   | C   | C   | A    | G    | C    | G    | A    | C    | A    | C    |
|      | MJY             | 4                | 11              | C  | C  | G   | A   | C   | A   | C   | G   | C   | C   | A   | C   | C   | G   | T   | G   | C   | C   | G   | T   | G   | C   | C    | A    | G    | C    | G    | A    | C    | A    |

The same number of Deduced AA Type indicates the same deduced amino acid sequence.

ORF (51–1220 bases).

SNPs of 287, 657, 764, and 1024 bases cause amino acid substitution.

SNPs observed in only 1 clone are omitted.

**Table S8.** SNPs of *DvCHI* cDNA in MJOr and MJY

| Line | Deduced AA type | Number of clones | Number of bases |    |    |     |     |     |     |     |     |     |     |     |     |   |
|------|-----------------|------------------|-----------------|----|----|-----|-----|-----|-----|-----|-----|-----|-----|-----|-----|---|
|      |                 |                  | 12              | 62 | 78 | 114 | 197 | 225 | 266 | 300 | 396 | 464 | 486 | 655 | 713 |   |
| MJOr | 1               | 11               | T               | C  | A  | C   | C   | C   | G   | G   | T   | T   | G   | T   | T   |   |
|      |                 | 1                | T               | C  | A  | C   | C   | C   | G   | G   | T   | T   | G   | C   | T   |   |
|      |                 | 9                | G               | C  | A  | C   | C   | C   | G   | G   | T   | T   | G   | T   | T   |   |
|      |                 | 1                | G               | C  | C  | C   | C   | C   | G   | G   | T   | T   | G   | T   | T   |   |
|      | 2               | 2                | T               | C  | C  | A   | C   | G   | C   | A   | A   | C   | A   | C   | T   |   |
|      |                 | 1                | G               | C  | C  | A   | C   | G   | C   | A   | A   | C   | A   | C   | T   |   |
|      |                 | 1                | G               | C  | C  | A   | C   | G   | C   | A   | A   | C   | A   | T   | T   |   |
|      | 3               | 3                | G               | C  | C  | C   | G   | G   | C   | G   | A   | C   | A   | T   | A   |   |
|      |                 | 2                | T               | C  | C  | C   | G   | G   | C   | G   | A   | C   | A   | T   | A   |   |
|      |                 | 1                | G               | C  | C  | C   | G   | G   | C   | G   | A   | C   | A   | T   | T   |   |
|      |                 | 1                | T               | C  | C  | C   | G   | G   | C   | G   | A   | C   | A   | T   | T   |   |
|      | 4               | 1                | T               | T  | C  | C   | C   | C   | G   | G   | T   | T   | G   | T   | T   |   |
|      |                 | 1                | G               | T  | C  | C   | C   | C   | G   | G   | T   | T   | G   | T   | T   |   |
|      | 5               | 2                | T               | T  | C  | C   | C   | C   | G   | G   | A   | C   | A   | C   | T   |   |
|      |                 | 1                | G               | T  | C  | C   | C   | C   | G   | G   | A   | C   | A   | C   | T   |   |
|      | 6               | 1                | G               | T  | C  | C   | G   | G   | C   | G   | A   | C   | A   | T   | A   |   |
|      | MJY             | 1                | 12              | T  | C  | A   | C   | C   | C   | G   | G   | T   | T   | G   | T   | T |
|      |                 |                  | 1               | T  | C  | A   | C   | C   | C   | G   | G   | T   | T   | G   | T   | A |
| 1    |                 |                  | T               | C  | C  | C   | C   | C   | G   | G   | T   | T   | G   | T   | T   |   |
| 4    |                 |                  | G               | C  | A  | C   | C   | C   | G   | G   | T   | T   | G   | T   | T   |   |
| 1    |                 |                  | G               | C  | C  | C   | C   | C   | G   | G   | T   | T   | G   | T   | T   |   |
| 1    |                 |                  | T               | C  | A  | C   | C   | C   | G   | G   | T   | T   | G   | C   | T   |   |
| 2    |                 | 6                | T               | C  | C  | A   | C   | G   | C   | A   | A   | C   | A   | C   | T   |   |
|      |                 | 1                | G               | C  | C  | A   | C   | G   | C   | A   | A   | C   | A   | C   | T   |   |
| 3    |                 | 2                | T               | C  | C  | C   | G   | G   | C   | G   | A   | C   | A   | T   | A   |   |
|      |                 | 1                | G               | C  | C  | C   | G   | G   | C   | G   | A   | C   | A   | T   | A   |   |
|      |                 | 1                | T               | C  | A  | C   | G   | G   | C   | G   | A   | C   | A   | T   | A   |   |
| 4    |                 | 1                | G               | T  | C  | C   | C   | C   | G   | G   | T   | T   | G   | T   | T   |   |
| 5    |                 | 2                | G               | T  | C  | C   | C   | C   | G   | G   | A   | C   | A   | C   | T   |   |
| 7    |                 | 1                | G               | C  | A  | C   | C   | C   | G   | G   | A   | C   | A   | C   | T   |   |
|      |                 | 2                | T               | C  | C  | C   | C   | C   | G   | G   | A   | C   | A   | C   | T   |   |

The same number of Deduced AA Type indicates the same deduced amino acid sequence.

ORF (1–675 bases).

SNPs of 62, 197, 225, 266, and 464 bases cause amino acid substitution.

SNPs observed in only 1 clone are omitted.

**Table S9.** SNPs of *DvF3H* cDNA in MJOr and MJY

| Line | Deduced AA type | Number of clones | Number of bases |     |     |     |     |     |     |     |     |     |     |     |     |     |     |     |      |      |      |      |
|------|-----------------|------------------|-----------------|-----|-----|-----|-----|-----|-----|-----|-----|-----|-----|-----|-----|-----|-----|-----|------|------|------|------|
|      |                 |                  | 36              | 118 | 228 | 259 | 270 | 282 | 314 | 380 | 467 | 617 | 635 | 705 | 728 | 797 | 890 | 905 | 1018 | 1073 | 1102 | 1133 |
| MJOr | 1               | 26               | G               | T   | C   | A   | T   | T   | G   | C   | G   | A   | A   | G   | G   | C   | G   | A   | C    | T    | G    | T    |
|      |                 | 1                | G               | T   | C   | A   | T   | T   | G   | C   | G   | G   | A   | G   | G   | C   | A   | A   | C    | C    | T    | T    |
|      |                 | 1                | G               | T   | C   | A   | T   | T   | G   | C   | G   | A   | A   | G   | G   | C   | G   | A   | C    | T    | G    | -    |
|      | 2               | 2                | A               | A   | C   | T   | C   | C   | C   | T   | G   | G   | G   | A   | A   | T   | A   | A   | C    | C    | G    | T    |
|      |                 | 4                | A               | A   | C   | T   | C   | C   | C   | T   | G   | G   | G   | A   | A   | T   | A   | A   | C    | C    | T    | T    |
|      | 3               | 2                | G               | A   | T   | T   | C   | T   | C   | C   | C   | G   | A   | G   | G   | C   | G   | G   | C    | T    | G    | T    |
|      |                 | 1                | G               | A   | T   | T   | C   | T   | C   | T   | C   | A   | A   | G   | G   | C   | G   | G   | C    | T    | G    | -    |
|      | 4               | 1                | G               | T   | C   | A   | T   | T   | G   | C   | G   | A   | A   | G   | G   | C   | G   | A   | T    | T    | G    | T    |
|      | 5               | 1                | G               | T   | C   | T   | C   | C   | C   | T   | G   | G   | A   | G   | G   | C   | G   | A   | C    | C    | T    | T    |
|      | MJY             | 1                | 20              | G   | T   | C   | A   | T   | T   | G   | C   | G   | A   | A   | G   | G   | C   | G   | A    | C    | T    | G    |
| 2    |                 |                  | G               | T   | C   | A   | T   | T   | G   | C   | G   | A   | A   | G   | G   | C   | G   | A   | C    | T    | T    | T    |
| 2    |                 | 5                | A               | A   | C   | T   | C   | C   | C   | T   | G   | G   | G   | A   | A   | T   | A   | A   | C    | C    | G    | T    |
|      |                 | 1                | A               | A   | C   | T   | C   | C   | C   | T   | G   | G   | G   | A   | A   | T   | A   | A   | C    | T    | G    | T    |
| 3    |                 | 1                | G               | A   | T   | T   | C   | T   | C   | C   | C   | G   | A   | G   | G   | C   | G   | G   | C    | T    | G    | T    |
|      |                 | 1                | G               | A   | T   | T   | C   | T   | C   | C   | C   | G   | A   | G   | G   | C   | G   | G   | C    | T    | T    | T    |
| 6    |                 | 1                | G               | T   | C   | A   | T   | T   | G   | C   | C   | G   | A   | G   | G   | C   | G   | G   | C    | T    | G    | T    |
| 7    |                 | 1                | G               | A   | C   | A   | T   | C   | C   | C   | G   | A   | A   | G   | G   | C   | G   | A   | C    | T    | G    | T    |
| 8    |                 | 1                | G               | A   | T   | T   | C   | C   | C   | C   | G   | A   | A   | G   | G   | C   | G   | A   | C    | T    | G    | T    |
| 9    |                 | 1                | G               | A   | C   | T   | C   | C   | C   | T   | G   | G   | G   | A   | A   | T   | A   | A   | C    | C    | G    | T    |
| 10   |                 | 1                | A               | A   | C   | T   | C   | C   | C   | T   | G   | A   | A   | G   | G   | C   | G   | A   | C    | T    | G    | T    |
| 11   | 1               | A                | A               | C   | T   | C   | C   | C   | T   | G   | G   | G   | A   | A   | T   | A   | A   | T   | T    | G    | T    |      |

The same number of Deduced AA Type indicates the same deduced amino acid sequence.

ORF (-10 to 1076 bases).

SNPs of 36, 118, 228, 259, 270, 282, 467, 705, and 1018 bases cause amino acid substitution.

SNPs observed in only 1 clone are omitted.

**Table S10.** SNPs of *DvDFR* cDNA in MJOr and MJY

| Line | Deduced AA type | Number of clones | Number of bases |     |     |     |     |     |     |     |     |     |     |     |     |     |     |     |     |      |      |
|------|-----------------|------------------|-----------------|-----|-----|-----|-----|-----|-----|-----|-----|-----|-----|-----|-----|-----|-----|-----|-----|------|------|
|      |                 |                  | 43              | 219 | 241 | 258 | 285 | 353 | 486 | 490 | 589 | 601 | 628 | 738 | 834 | 922 | 940 | 942 | 986 | 1131 | 1134 |
| MJOr | 1               | 13               | A               | T   | A   | A   | T   | C   | G   | G   | A   | G   | T   | A   | G   | C   | G   | C   | C   | G    | T    |
|      | 2               | 7                | A               | T   | T   | G   | A   | C   | G   | G   | A   | G   | T   | A   | G   | C   | G   | C   | C   | G    | T    |
|      | 3               | 2                | C               | T   | A   | G   | A   | T   | G   | G   | G   | A   | T   | A   | G   | C   | G   | C   | T   | G    | T    |
|      | 4               | 5                | A               | T   | A   | A   | T   | C   | G   | G   | A   | G   | T   | A   | G   | C   | G   | C   | T   | G    | T    |
|      |                 | 2                | A               | T   | A   | G   | A   | C   | G   | G   | A   | G   | T   | A   | G   | C   | G   | C   | T   | G    | T    |
|      | 5               | 3                | A               | T   | A   | G   | A   | T   | A   | A   | A   | G   | G   | G   | A   | T   | A   | T   | T   | C    | —    |
|      | 6               | 1                | A               | T   | A   | G   | A   | T   | G   | G   | G   | A   | T   | A   | G   | C   | G   | C   | C   | G    | T    |
|      | 7               | 1                | A               | T   | A   | A   | T   | C   | G   | G   | G   | A   | T   | A   | G   | C   | G   | C   | C   | G    | T    |
| 8    | 1               | C                | T               | A   | G   | A   | T   | A   | A   | A   | G   | G   | G   | A   | T   | A   | T   | T   | C   | —    |      |
| MJY  | 1               | 9                | A               | T   | A   | A   | T   | C   | G   | G   | A   | G   | T   | A   | G   | C   | G   | C   | C   | G    | T    |
|      |                 | 1                | A               | A   | A   | A   | T   | C   | G   | G   | A   | G   | T   | A   | G   | C   | G   | C   | C   | G    | T    |
|      | 2               | 5                | A               | T   | T   | G   | A   | C   | G   | G   | A   | G   | T   | A   | G   | C   | G   | C   | C   | G    | T    |
|      | 3               | 8                | C               | T   | A   | G   | A   | T   | G   | G   | G   | A   | T   | A   | G   | C   | G   | C   | T   | G    | T    |
|      |                 | 1                | C               | C   | A   | G   | A   | T   | G   | G   | G   | A   | T   | A   | G   | C   | G   | C   | T   | G    | T    |
|      | 4               | 4                | A               | T   | A   | G   | A   | C   | G   | G   | A   | G   | T   | A   | G   | C   | G   | C   | T   | G    | T    |
|      | 9               | 1                | C               | T   | T   | G   | A   | C   | G   | G   | A   | G   | T   | A   | G   | C   | G   | C   | C   | G    | T    |
|      | 10              | 1                | C               | T   | A   | G   | A   | C   | G   | G   | A   | G   | T   | A   | G   | C   | G   | C   | C   | G    | T    |

The same number of Deduced AA Type indicates the same deduced amino acid sequence.

ORF (18–1028 bases).

SNPs of 43, 241, 353, 490, 589, 601, 628, 940, and 986 bases cause amino acid substitution.

SNPs observed in only 1 clone are omitted.

**Table S11.** SNPs in the exon of the *DvCHS1* genomic region in MJOr, MJY, and MJW

| Line | Deduced AA type | Number of clones | Number of bases |    |    |     |     |     |     |     |     |     |     |     |     |     |     |     |     |     |     |     |     |     |     |      |      |      |      |      |      |      |      |  |  |  |  |  |
|------|-----------------|------------------|-----------------|----|----|-----|-----|-----|-----|-----|-----|-----|-----|-----|-----|-----|-----|-----|-----|-----|-----|-----|-----|-----|-----|------|------|------|------|------|------|------|------|--|--|--|--|--|
|      |                 |                  | 27              | 45 | 47 | 197 | 203 | 287 | 377 | 446 | 491 | 802 | 811 | 814 | 823 | 841 | 844 | 857 | 719 | 781 | 784 | 773 | 809 | 842 | 853 | 1024 | 1025 | 1154 | 1178 | 1184 | 1237 | 1345 | 1348 |  |  |  |  |  |
| MJOr | 1               | 6                | C               | C  | G  | G   | T   | C   | A   | A   | T   | G   | T   | T   | G   | A   | C   | A   | C   | T   | G   | C   | T   | T   | T   | A    | A    | G    | G    | G    | T    | T    | C    |  |  |  |  |  |
|      | 2               | 1                | C               | C  | G  | A   | C   | A   | C   | G   | T   | G   | C   | T   | G   | G   | C   | A   | A   | C   | T   | C   | T   | T   | T   | A    | A    | G    | G    | G    | T    | T    | C    |  |  |  |  |  |
|      | 9               | --               | --              | -- | A  | C   | A   | C   | G   | T   | G   | C   | T   | G   | G   | C   | A   | A   | C   | T   | C   | G   | C   | C   | A   | G    | G    | C    | G    | T    | A    | T    |      |  |  |  |  |  |
|      | 4               | 9                | C               | C  | G  | A   | C   | A   | C   | G   | C   | C   | A   | C   | C   | G   | T   | G   | C   | C   | G   | T   | G   | C   | C   | G    | G    | C    | G    | A    | C    | A    | C    |  |  |  |  |  |
| MJY  | 1               | 5                | C               | C  | G  | G   | T   | C   | A   | A   | T   | G   | T   | T   | G   | A   | C   | A   | C   | T   | G   | C   | T   | T   | T   | A    | A    | G    | G    | G    | T    | T    | C    |  |  |  |  |  |
|      | 1               | 1                | C               | C  | G  | A   | C   | C   | A   | A   | T   | G   | T   | T   | G   | A   | C   | A   | C   | T   | G   | C   | T   | T   | T   | A    | A    | G    | G    | G    | T    | T    | C    |  |  |  |  |  |
|      | 1               | 1                | G               | A  | A  | G   | T   | C   | A   | A   | T   | G   | T   | T   | G   | A   | C   | A   | A   | C   | T   | C   | G   | T   | T   | A    | A    | G    | G    | G    | T    | T    | C    |  |  |  |  |  |
|      | 4               | 9                | C               | C  | G  | A   | C   | A   | C   | G   | C   | C   | A   | C   | C   | G   | T   | G   | C   | C   | G   | T   | G   | C   | C   | G    | G    | C    | G    | A    | C    | A    | C    |  |  |  |  |  |
| MJW  | 1               | 7                | C               | C  | G  | G   | T   | C   | A   | A   | T   | G   | T   | T   | G   | A   | C   | A   | C   | T   | G   | C   | T   | T   | T   | A    | A    | G    | G    | G    | T    | T    | C    |  |  |  |  |  |
|      | 2               | 3                | --              | -- | -- | A   | C   | A   | C   | G   | T   | G   | C   | T   | G   | G   | C   | A   | A   | C   | T   | C   | G   | C   | C   | A    | G    | G    | C    | G    | T    | A    | T    |  |  |  |  |  |
|      | 4               | 6                | C               | C  | G  | A   | C   | A   | C   | G   | C   | C   | A   | C   | C   | G   | T   | G   | C   | C   | G   | T   | G   | C   | C   | G    | G    | C    | G    | A    | C    | A    | C    |  |  |  |  |  |

The same number of Deduced AA Type indicates the same deduced amino acid sequence.

ORF (51–1220 bases).

We could not determine a part of type 2 sequence from 1 to 54.

SNPs observed in only 1 clone are omitted.

**Table S12.** SNPs in the intron of the *DvCHS1* genomic region in MJOr, MJY, and MJW

| Line | Deduced AA type | Number of clones | Number of bases |     |     |     |     |     |     |     |     |     |     |     |     |     |     |     |     |     |     |         |     |     |     |     |     |     |     |     |     |     |     |  |  |  |  |  |  |  |  |  |  |  |  |  |  |  |  |  |
|------|-----------------|------------------|-----------------|-----|-----|-----|-----|-----|-----|-----|-----|-----|-----|-----|-----|-----|-----|-----|-----|-----|-----|---------|-----|-----|-----|-----|-----|-----|-----|-----|-----|-----|-----|--|--|--|--|--|--|--|--|--|--|--|--|--|--|--|--|--|
|      |                 |                  | 17-21           | 121 | 123 | 171 | 221 | 222 | 243 | 260 | 284 | 285 | 298 | 341 | 343 | 396 | 411 | 412 | 429 | 481 | 484 | 512-626 | 641 | 658 | 700 | 730 | 731 | 732 | 740 | 741 | 771 | 780 | 781 |  |  |  |  |  |  |  |  |  |  |  |  |  |  |  |  |  |
| MJOr | 1               | 5                | —               | T   | —   | C   | G   | C   | T   | —   | G   | G   | T   | T   | T   | T   | A   | A   | A   | A   | T   | —       | G   | T   | T   | T   | A   | C   | —   | —   | T   | A   | A   |  |  |  |  |  |  |  |  |  |  |  |  |  |  |  |  |  |
|      | 2               | 9                | ○               | A   | T   | C   | G   | T   | T   | A   | C   | A   | C   | T   | G   | T   | A   | A   | G   | G   | A   | —       | G   | C   | A   | A   | G   | T   | T   | —   | C   | C   | C   |  |  |  |  |  |  |  |  |  |  |  |  |  |  |  |  |  |
|      | 4               | 8                | ○               | A   | A   | T   | A   | C   | G   | —   | G   | G   | T   | A   | T   | A   | G   | C   | A   | A   | A   | ○       | A   | C   | A   | T   | G   | T   | T   | T   | C   | A   | A   |  |  |  |  |  |  |  |  |  |  |  |  |  |  |  |  |  |
|      | 1               | 1                | ○               | A   | T   | C   | G   | T   | T   | A   | C   | A   | C   | T   | G   | —   | —   | —   | —   | A   | A   | ○       | A   | C   | A   | T   | G   | T   | T   | —   | C   | A   | A   |  |  |  |  |  |  |  |  |  |  |  |  |  |  |  |  |  |
| 1    | 1               | ○                | A               | A   | T   | A   | C   | G   | —   | G   | G   | T   | A   | T   | A   | G   | C   | A   | A   | A   | ○   | A       | C   | A   | T   | G   | T   | T   | —   | C   | A   | A   |     |  |  |  |  |  |  |  |  |  |  |  |  |  |  |  |  |  |
| MJY  | 1               | 6                | —               | T   | —   | C   | G   | C   | T   | —   | G   | G   | T   | T   | T   | T   | A   | A   | A   | A   | T   | —       | G   | T   | T   | T   | A   | C   | —   | —   | T   | A   | A   |  |  |  |  |  |  |  |  |  |  |  |  |  |  |  |  |  |
|      | 2               | 1                | ○               | A   | T   | C   | G   | T   | T   | A   | C   | A   | C   | T   | G   | T   | A   | A   | G   | G   | A   | —       | G   | C   | A   | A   | G   | T   | T   | —   | C   | C   | C   |  |  |  |  |  |  |  |  |  |  |  |  |  |  |  |  |  |
|      | 4               | 9                | ○               | A   | A   | T   | A   | C   | G   | —   | G   | G   | T   | A   | T   | A   | G   | C   | A   | A   | A   | ○       | A   | C   | A   | T   | G   | T   | T   | —   | C   | A   | A   |  |  |  |  |  |  |  |  |  |  |  |  |  |  |  |  |  |
|      | 1               | 1                | ○               | A   | T   | C   | G   | T   | T   | A   | G   | G   | T   | T   | T   | T   | A   | A   | A   | A   | T   | —       | G   | T   | T   | T   | A   | C   | —   | —   | T   | A   | A   |  |  |  |  |  |  |  |  |  |  |  |  |  |  |  |  |  |
| MJW  | 1               | 7                | —               | T   | —   | C   | G   | C   | T   | —   | G   | G   | T   | T   | T   | T   | A   | A   | A   | A   | T   | —       | G   | T   | T   | T   | A   | C   | —   | —   | T   | A   | A   |  |  |  |  |  |  |  |  |  |  |  |  |  |  |  |  |  |
|      | 2               | 3                | ○               | A   | T   | C   | G   | T   | T   | A   | C   | A   | C   | T   | G   | T   | A   | A   | G   | G   | A   | —       | G   | C   | A   | A   | G   | T   | T   | —   | C   | C   | C   |  |  |  |  |  |  |  |  |  |  |  |  |  |  |  |  |  |
|      | 4               | 6                | ○               | A   | A   | T   | A   | C   | G   | —   | G   | G   | T   | A   | T   | A   | G   | C   | A   | A   | A   | ○       | A   | C   | A   | T   | G   | T   | T   | —   | C   | A   | A   |  |  |  |  |  |  |  |  |  |  |  |  |  |  |  |  |  |

The number of Deduced AA Type indicates the deduced amino acid sequence coded by the exon.

SNPs observed in only 1 clone are omitted.
